# Supplementary material for: Synergistic effect of ZnO–ZnFe2O4 heterostructures for enhanced surface catalytic activity in Cr(vi) reduction, green H2 generation and CO sensing: an experimental study supported by DFT
Source: Royal Society of Chemistry journal article supplement (doi:10.1039/d4nr04687k), 2025-01-01
Supplement: d4nr04687k1.pdf [file d4nr04687k1.pdf]

## Supplementary Information

### **Synergistic Effect of ZnO-ZnFe<sub>2</sub>O<sub>4</sub> Heterostructure for Enhanced Surface Catalytic Activity in Cr (VI) Reduction, Green H<sub>2</sub> Generation and CO Sensing: Experimental Study supported by DFT**

Subhajit Mojumder<sup>1</sup>, Tanushri Das<sup>2</sup>, Sanchi Monga<sup>3</sup>, Sourabh Pal<sup>4</sup>, Prantik Bhattacharya<sup>1</sup>, Srabanti Ghosh<sup>4\*</sup>, Saswata Bhattacharya<sup>3\*</sup>, Mrinal Pal<sup>1\*</sup>

1- Functional Materials & Devices Division, CSIR-Central Glass & Ceramic Research Institute, 196, Raja S.C. Mullick Road, Jadavpur, Kolkata-700 032, West Bengal, India

2- Department of Physics, Jadavpur University, Kolkata-700032, India.

3- Department of Physics, Indian Institute of Technology Delhi, New Delhi 110016, India.

4- Energy Materials & Devices Division, CSIR-Central Glass & Ceramic Research Institute, 196, Raja S.C. Mullick Road, Jadavpur, Kolkata-700 032, West Bengal, India

#### **Corresponding author E-mail address:**

srabanti@cgcri.res.in (S. Ghosh); saswata@physics.iitd.ac.in (S. Bhattacharya); palm@cgcri.res.in (M. Pal).

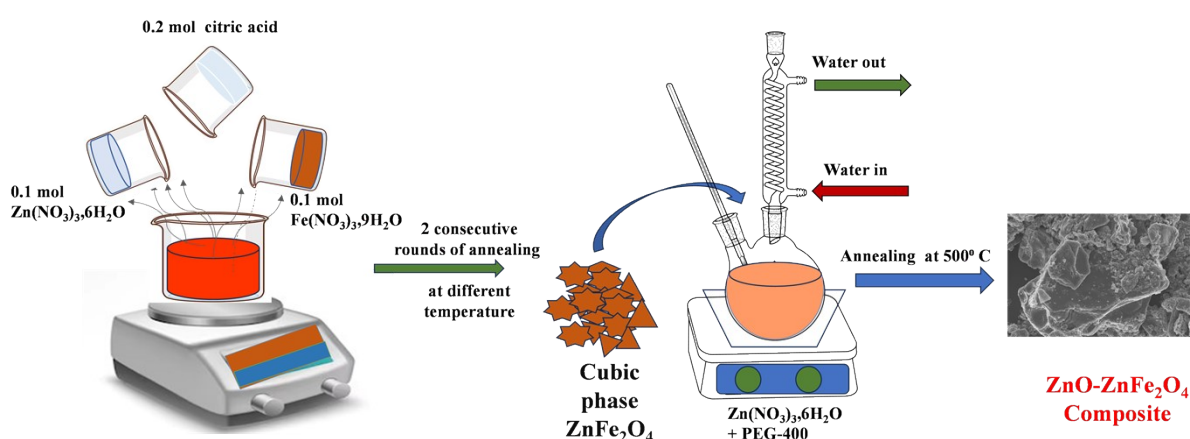

**Fig. S 1.** Schematic of synthesis procedure of ZnO-ZFO heterostructure.

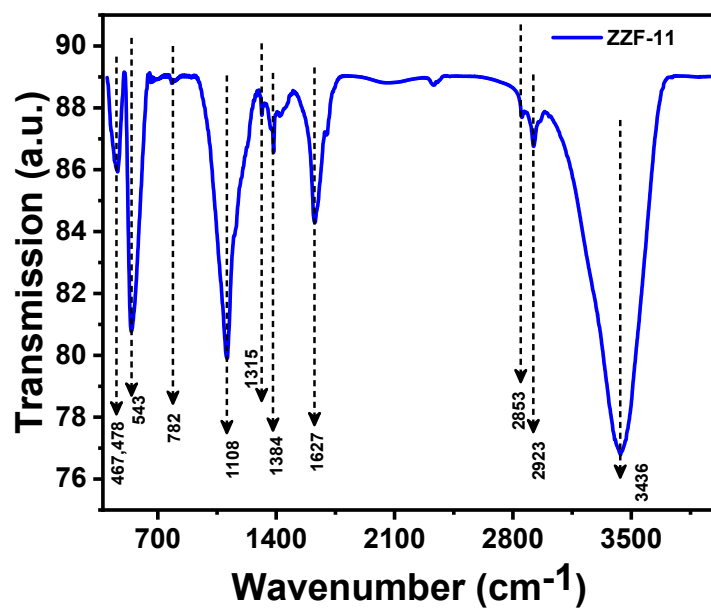

Fig. S 2. FTIR spectra of ZZF-11 sample.

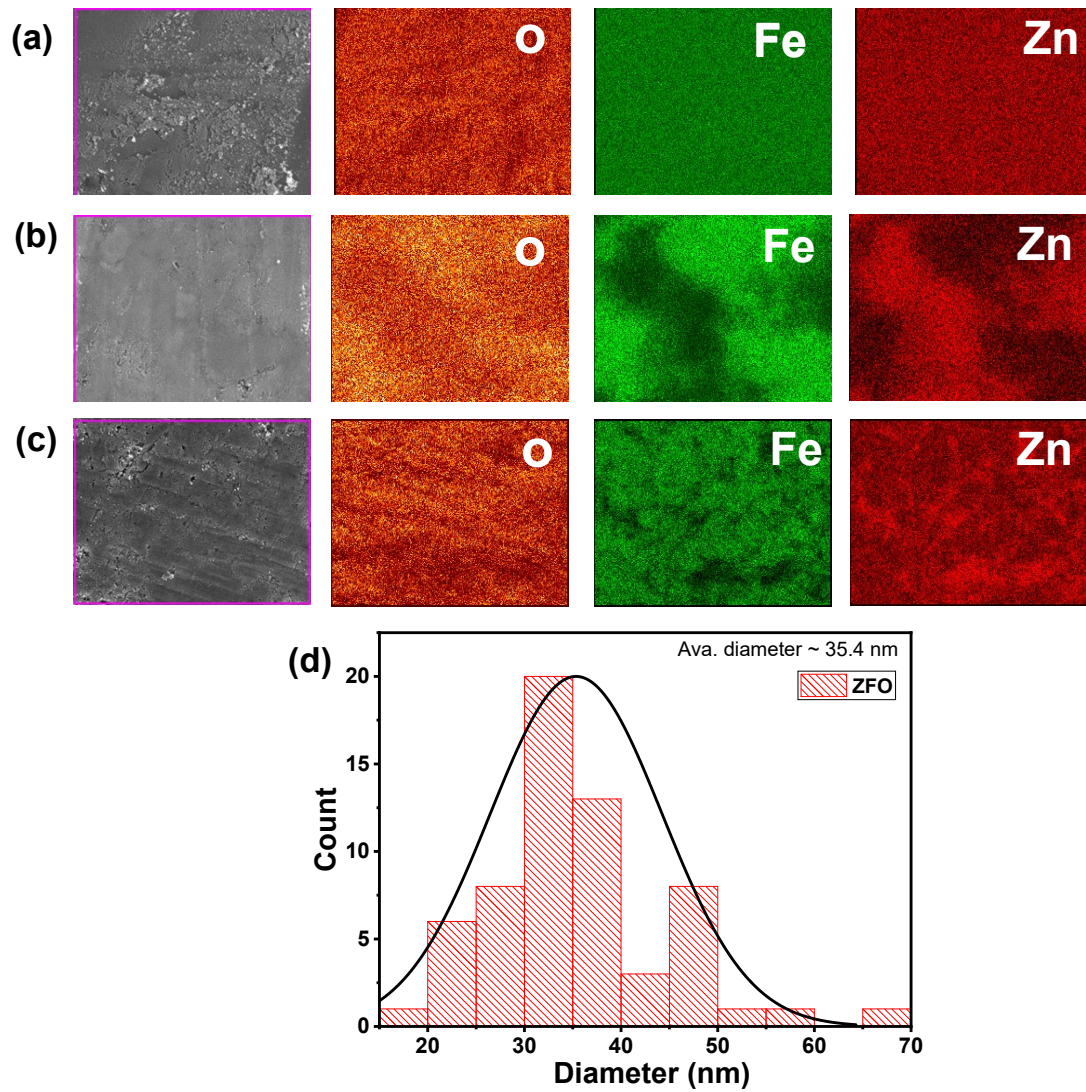

**Fig. S 3.** Elemental mapping of (a) ZFO (b) ZZF-31 (c) ZZF-13 (d) Histogram of Particle size distribution of ZFO corresponding to Fig.4(g)

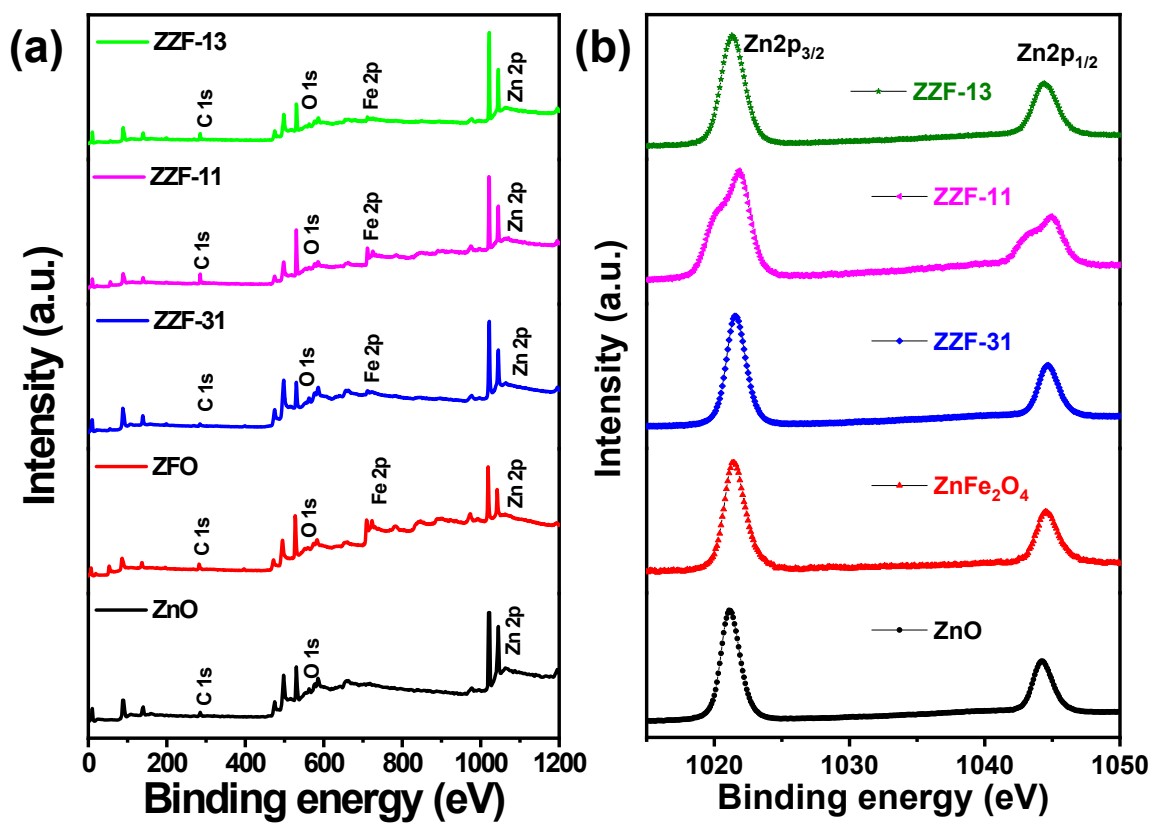

Fig. S 4. (a) XPS survey scan of ZnO, ZFO, ZZF-11, ZZF-13, ZZF-31. (b) HR-XPS spectra of Zn 2p region of all the samples.

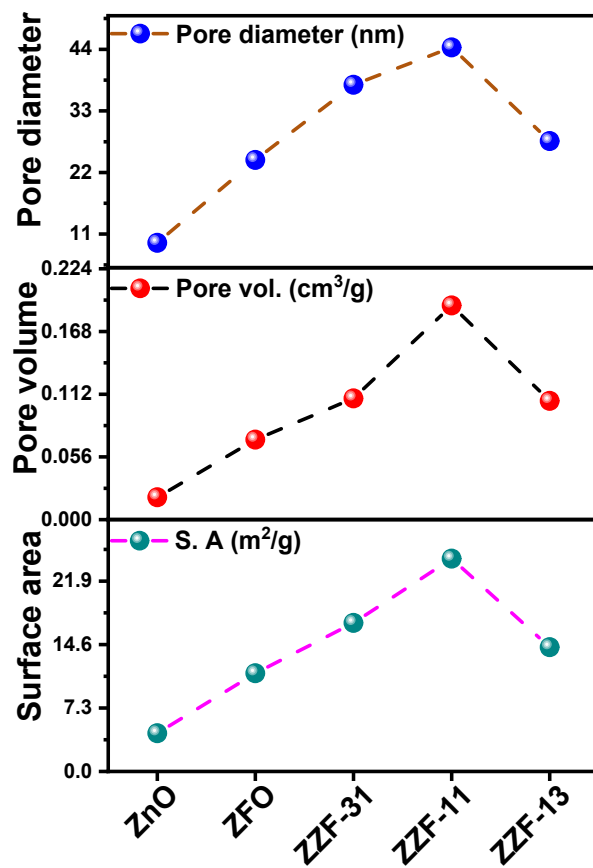

**Fig. S 5.** Variation of surface area, pore volume and pore diameter of in ZnO, ZFO, ZZF-31, ZZF-11, ZZF-13 samples.

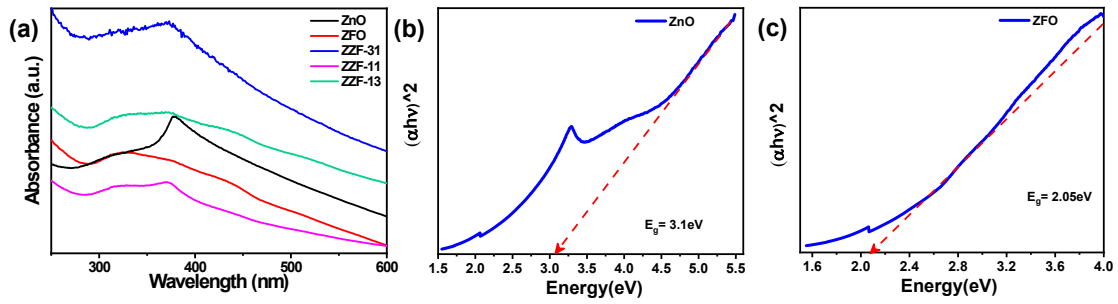

**Fig. S 6.** (a) UV-Vis adsorption spectra of all the samples. Tauc plot of (b) ZnO, (c) ZFO.

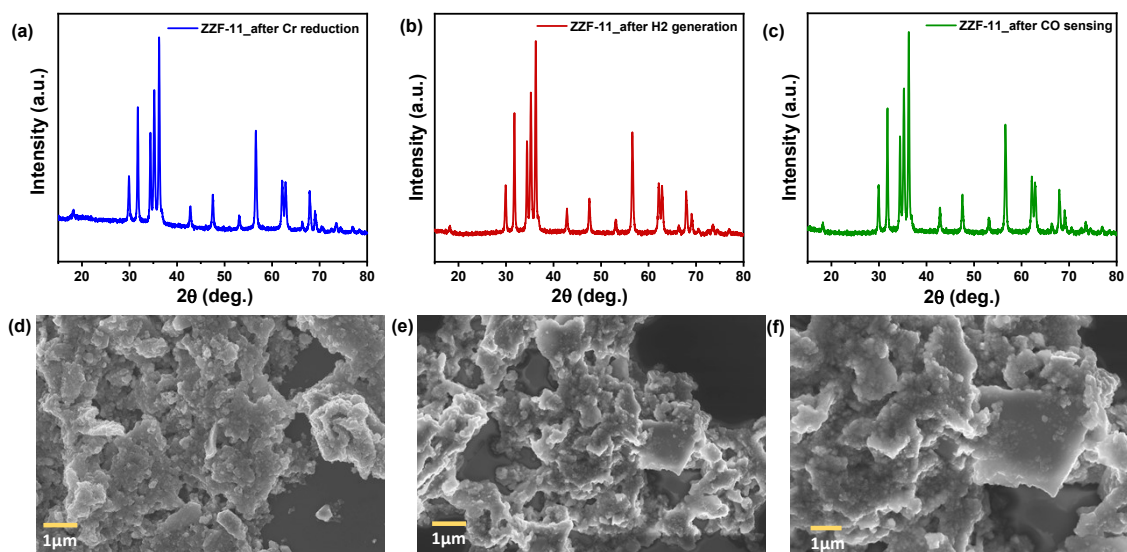

**Fig. S 7.** XRD pattern and FESEM morphology of the ZZF-11 sample after (a,d) complete degradation of Cr(VI), (b,e) photocatalytic H<sub>2</sub> generation, (c,f) repetitive CO sensing test respectively.

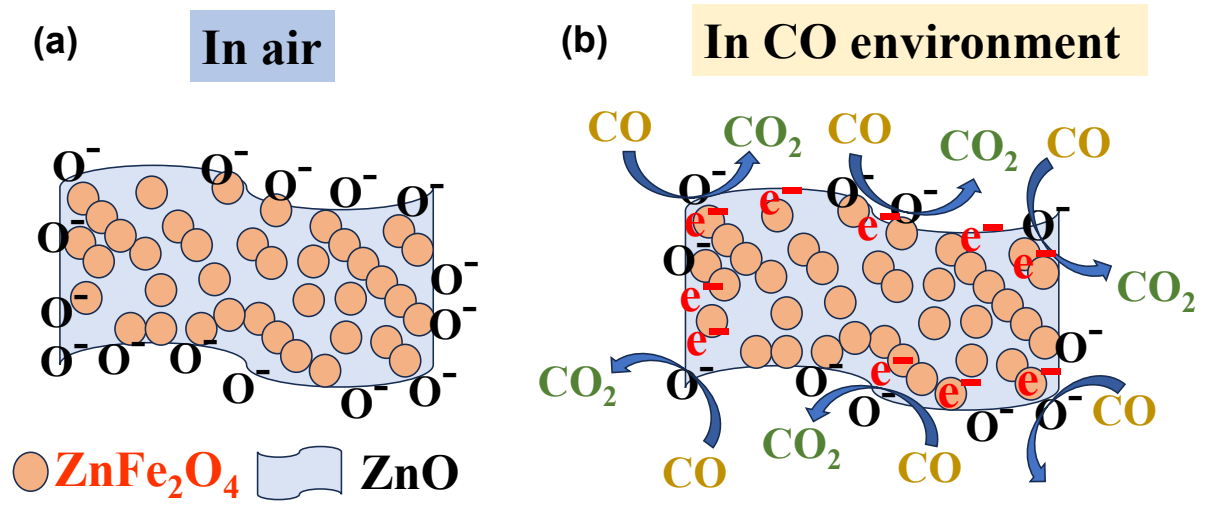

Fig. S 8. Schematic of the CO sensing mechanism of ZZF-11.



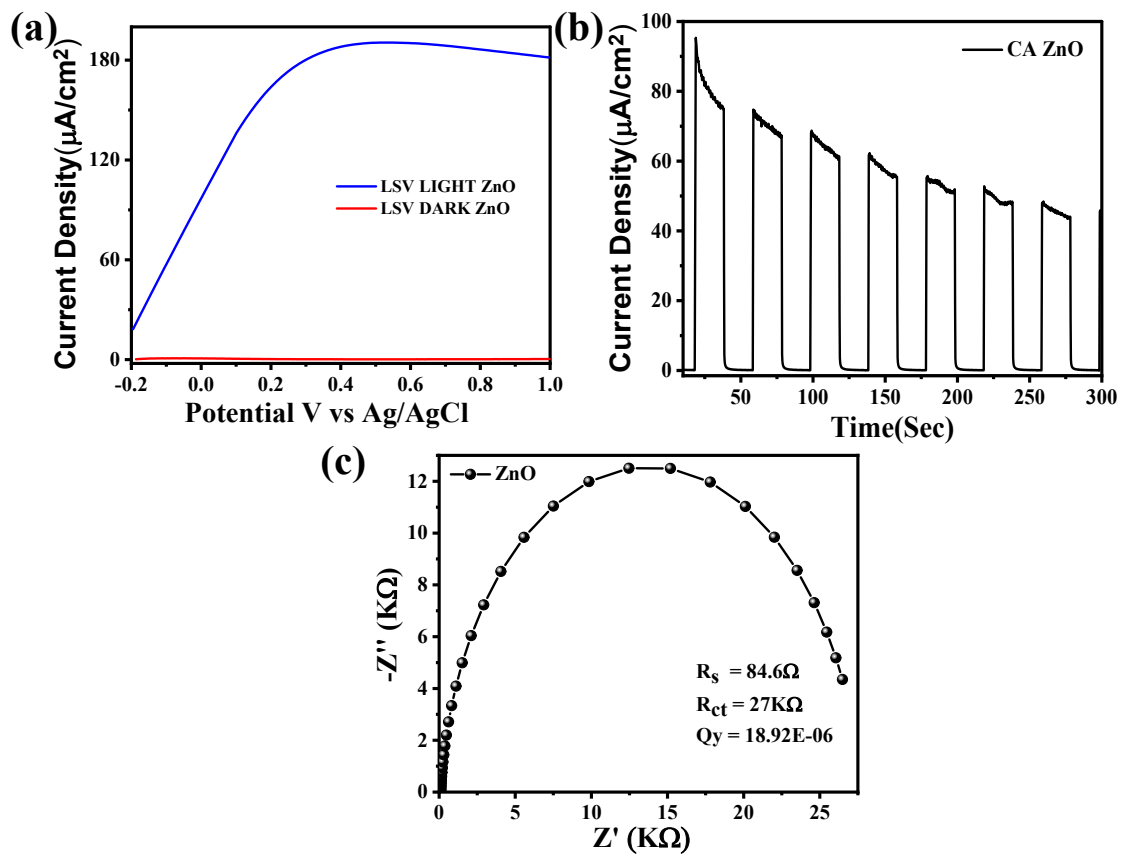

**Fig. S 9.** (a) LSV curve of ZnO at light on/off state. (b) Transient photocurrent spectra of ZnO. (c) Electrochemical impedance spectra of ZnO and (d) M-S plot of ZnO.

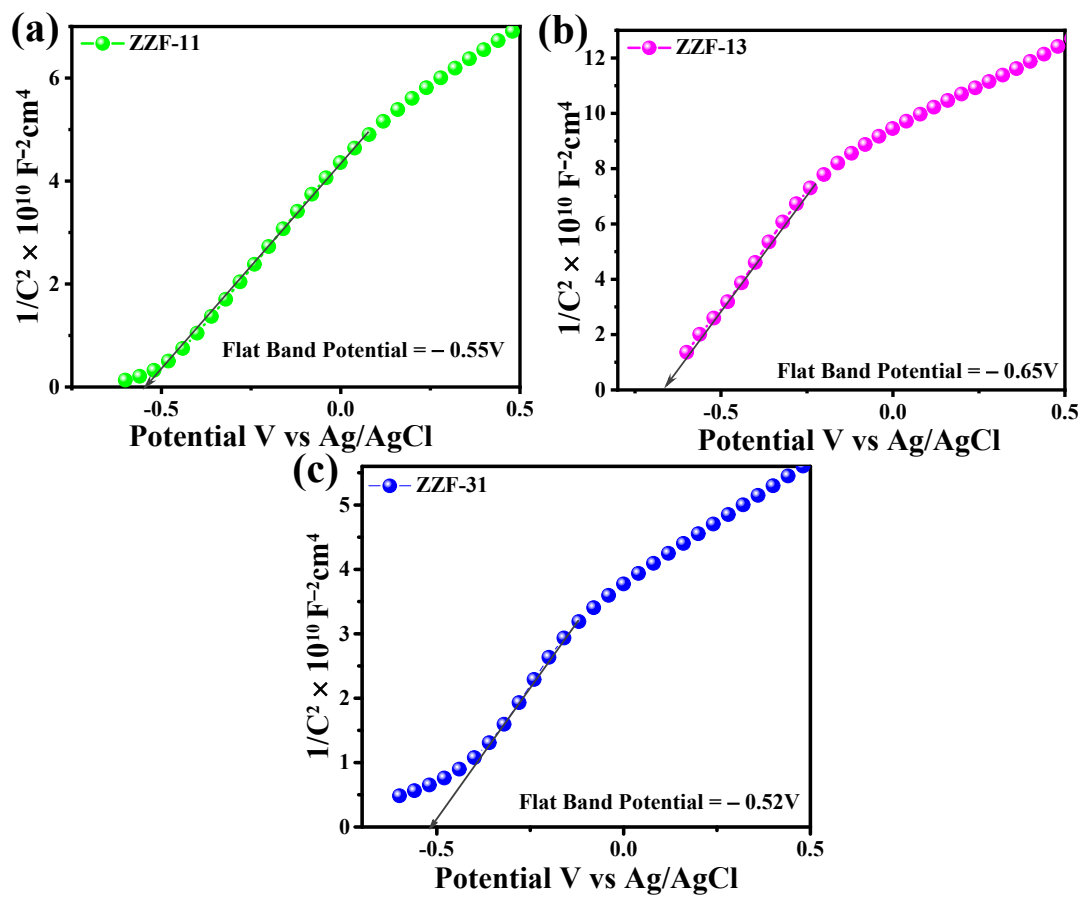

Fig. S 10. M-S plot of (a) ZZF-11, (b) ZZF-13 and (c) ZZF-31
